# Supplementary material for: Genomic insights into strategies used by Xanthomonas albilineans with its reduced artillery to spread within sugarcane xylem vessels
Source: PubMed Central journal article supplement (PMC3542200; doi:10.1186/1471-2164-13-658), 2012-11-21
Supplement: 1471-2164-13-658-S3.pdf [file 1471-2164-13-658-S3.pdf]

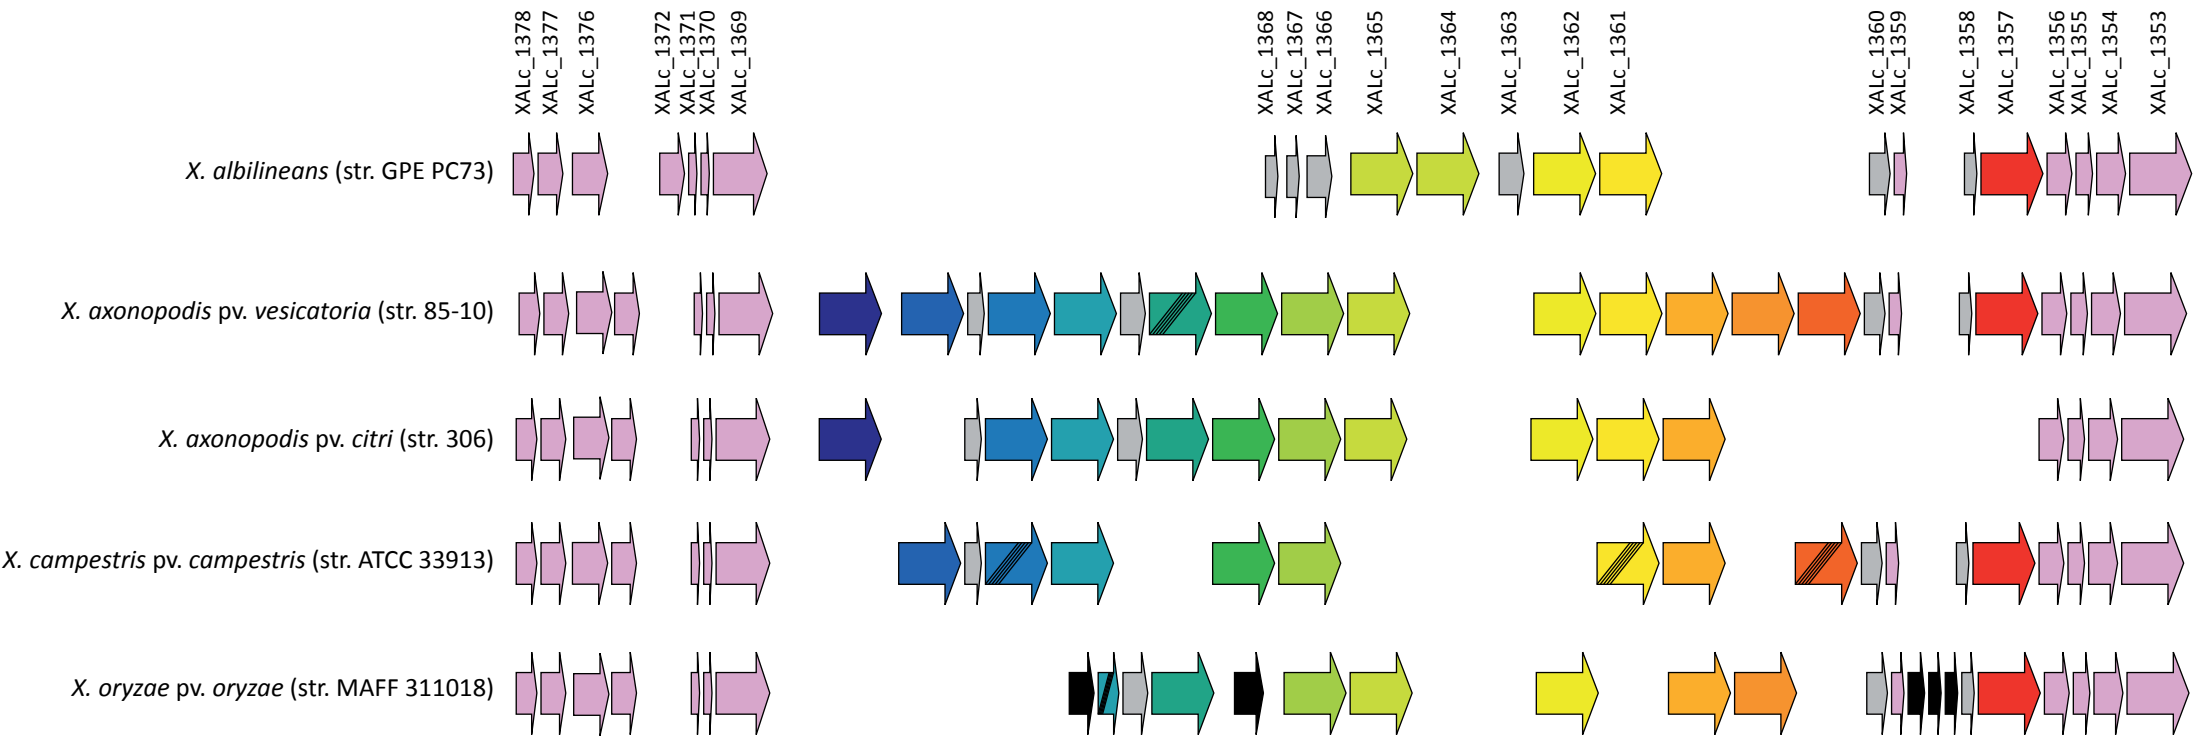

 Methyl-accepting proteins

 Hypothetical proteins

 Other chemotaxis proteins

 IS elements / transposases
