# Supplementary material for: Genomic insights into strategies used by Xanthomonas albilineans with its reduced artillery to spread within sugarcane xylem vessels
Source: PubMed Central journal article supplement (PMC3542200; doi:10.1186/1471-2164-13-658), 2012-11-21
Supplement: 1471-2164-13-658-S6.pdf [file 1471-2164-13-658-S6.pdf]

CRISPR1 spacers distribution

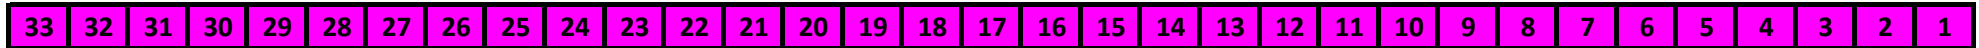

CRISPR2 spacers distribution

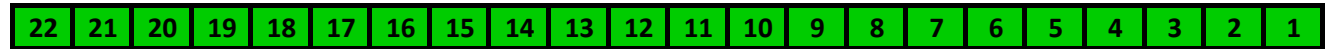

| prophage region |                                            |    |                                    |
|-----------------|--------------------------------------------|----|------------------------------------|
| 33              | XALc_0178                                  | 16 | XALc_0195 (94%)                    |
| 14              | = 18 between XALc_0207 and XALc_0208 (97%) | 15 | XALc_0206                          |
| 17              | XALc_0210 (97%)                            | 13 | XALc_0187                          |
| 2               | between XALc_0186 and XALc_0187 (97%)      | 4  | XALc_0206                          |
| 9               | XALc_0228 (97%)                            | 6  | XALc_0242                          |
| 3               | XALc_0224                                  | 4  | both XALc_0182 and XALc_0183 (97%) |
| 2               | XALc_0203                                  | 19 | XALc_0189                          |

| phages and plasmid related sequences |                                       |    |
|--------------------------------------|---------------------------------------|----|
| 22                                   | between XALc_1544 and XALc_1545 (89%) | 8  |
| 11                                   | XALc_1544 (94%)                       | 7  |
| 8                                    | XALp_3174 (88%)                       | 12 |
| 7                                    | XALp_3174 (97%)                       | 12 |

| housekeeping related sequence |
|-------------------------------|
| 31                            |
